# Supplementary material for: Perioperative Risk Assessment for Gastrectomy by Surgical Apgar Score
Source: Springer Nature journal article supplement (doi:10.1245/s10434-014-3653-2), 2014-03-25
Supplement: MOESM1 [file 9801624]

Supplementary data

Supplementary Table 1. Sensitivity, specificity, and positive predictive value at each cut-off value for oSAS (a) and mSAS (b).

(a)

|  | Sensitivity (%) | Specificity (%) | Positive predictive value (%) |
| --- | --- | --- | --- |
| oSAS ≤ 4 | 2.8 | 96.9 | 10.0 |
| oSAS ≤ 5 | 22.2 | 90.7 | 22.9 |
| oSAS ≤ 6 | 47.2 | 73.6 | 18.1 |
| oSAS ≤ 7 | 75.0 | 44.1 | 14.2 |
| oSAS ≤ 8 | 97.2 | 14.3 | 12.3 |

(b)

|  | Sensitivity (%) | Specificity (%) | Positive predictive value (%) |
| --- | --- | --- | --- |
| mSAS ≤ 4 | 13.8 | 93.6 | 21.7 |
| mSAS ≤ 5 | 44.4 | 81.8 | 23.2 |
| mSAS ≤ 6 | 80.5 | 60.6 | 20.1 |
| mSAS ≤ 7 | 88.8 | 35.6 | 14.6 |
| mSAS ≤ 8 | 91.6 | 16.4 | 11.9 |

Abbreviations: oSAS, original surgical Apgar score; mSAS, modified surgical Apgar score
